# Supplementary material for: Description of Pseudomonas imrae sp. nov., carrying a novel class C β-lactamase gene variant, isolated from gut samples of Atlantic mackerel (Scomber scombrus)
Source: Front Microbiol. 2025 Apr 14;16:1530878. doi: 10.3389/fmicb.2025.1530878 (PMC12057487; doi:10.3389/fmicb.2025.1530878)
Supplement: SUPPLEMENTARY TABLE 2 — Phenotypic characteristics of the three strains of the proposed novel species and the type strain of Pseudomonas mucidolens. [file Table_2.xlsx]

## Sheet: Phenotypic features
Test panel	Test No.	Phenotypic Test	1	2	3	4
-	1	Gram stain	N	N	N	N
API® ZYM (Ref. 25200)	2	α-fucosidase activity	N	N	N	N
	3	α-mannosidase activity	N	N	N	N
	4	N-acetyl-β-glucosaminidase activity	N	N	N	N
	5	β-glucosidase activity	N	N	N	N
	6	α-glucosidase activity	N	N	N	N
	7	β-glucuronidase activity	N	N	N	N
	8	β-galactosidase	N	N	N	N
	9	α-galactosidase	N	N	N	N
	10	Naphthol-AS-BI-phosphohydrolase	P	P	P	P
	11	Acid phosphatase activity	P	P	P	P
	12	α-chymotrypsin activity	N	N	N	N
	13	Trypsin activity	P	N	N	P
	14	Cystine arylamidase activity	N	N	N	N
	15	Valine arylamidase	N	N	N	N
	16	Leucine arylamidase	P	P	P	P
	17	Lipase (C 14) activity	N	N	N	N
	18	Ester Lipase (C 8) activity	P	P	P	N
	19	Esterase (C-4) activity	P	P	P	N
	20	Alkaline phosphatase activity	P	P	N	P
API® 20 NE (Ref. 20050)	21	Oxidase reaction (OX)	P	P	P	P
	22	Phenylacetate assimilation (PAC)	N	N	N	N
	23	Citrate assimilation (CIT)	P	P	P	P
	24	Malate assimilation (MLT)	P	P	P	P
	25	Adipate assimilation (ADI)	N	N	N	N
	26	Caprate assimilation (CAP)	P	P	P	P
	27	Potassium gluconate assimilation (GNT)	P	P	P	P
	28	D-Maltose assimilation (MAL)	N	N	N	N
	29	N-Acetylglucosamine assimilation (NAC)	P	P	P	P
	30	D-Mannitol assimilation (MAN)	P	P	P	N
	31	D-Mannose assimilation (MNE)	P	P	P	N
	32	L-Arabinose assimilation (ARA)	P	P	P	P
	33	D-Glucose assimilation (GLU)	P	P	P	P
	34	β-Galactosidase (PNPG)	N	N	N	N
	35	Gelatin hydrolisis (GEL)	P	P	P	N
	36	Esculin hydrolisis (ESC)	N	N	N	N
	37	Urease (URE)	N	N	N	N
	38	L-Arginine dihydrolase activity (ADH)	P	P	P	N
	39	D-Glucose fermentation (GLU)	N	N	N	N
	40	Indole production (TRP)	N	N	N	N
	41	Nitrate reduction (NIT)	P	P	P	P
ASSIM (assimilation)	42	Lactate + Methionine assimilation	P	P	P	P
	43	Lactate assimilation	P	P	P	P
	44	Sucrose assimilation	P	P	P	N
	45	Phenylacetate assimilation	N	N	N	N
	46	Citrate assimilation	P	P	P	P
	47	Malate assimilation	P	P	P	P
	48	Adipate assimilation	N	N	N	N
	49	Caprate assimilation	P	P	P	N
	50	Gluconate assimilation	P	P	P	P
	51	Maltose assimilation	N	N	N	N
	52	N-Acetylglucosamine assimilation	P	P	P	N
	53	Mannitol assimilation	P	P	P	N
	54	Mannose assimilation	P	P	P	N
	55	Arabinose assimilation	P	P	P	N
	56	Norleucine assimilation	N	N	N	N
	57	Arginine assimilation	P	P	P	N
	58	Trehalose assimilation	P	P	P	P
	59	Glucose assimilation	P	P	P	P
ESC (esculin)	60	NaCl 0.5% (growth)	P	P	P	P
	61	NaCl 1.5% (growth)	P	P	P	P
	62	NaCl 3% (growth)	P	P	P	N
	63	NaCl 4.5% (growth)	P	P	N	0
	64	NaCl 5% (growth)	P	N	P	0
	65	NaCl 6% (growth)	N	N	N	Na
	66	NaCl 7% (growth)	N	N	N	0
	67	NaCl 10% (growth)	N	N	N	NB
	68	H2S production	N	N	N	N
	69	Triple Sugar Iron (TSI) agar acidification	N	N	N	N
	70	Acetamide utilization	N	N	N	N
	71	DNAse activity	N	N	N	N
	72	Indole production	N	N	N	N
	73	β-galactopyranosidase activity (Ortho NitroPhenyl-ß-D-Galactopyranosidase) (ONPG)	N	N	N	N
	74	Esculin hydrolysis	N	N	N	N
DEC (decarboxylase)	75	Gelatine liqufation (Kohn's test)	N	N	N	N
	76	Urease activity (Christensen Urea Agar)	N	N	N	N
	77	N2/N2O-denitrification	N	N	N	N
	78	NO2--reduction	N	N	N	N
	79	NO3--reduction	P	P	P	P
	80	Arginine, ADH	P	P	P	N
	81	Ornithine, OD	N	N	N	N
	82	Lysine, LD	N	N	N	N
OF	83	Amylase activity	N	N	N	N
	84	Tween 80	P	P	P	P
	85	10% lactose	N	N	N	N
	86	Cetrimide	P	P	P	P
	87	Fluorescin	P	P	P	N
	88	D-Xylose oxidation	P	P	P	P
	89	D-Xylose fermentation	N	N	N	0
	90	D-Fructose oxidation	N	N	N	N
	91	D-Fructose fermentation	N	N	N	0
	92	Adonitol oxidation	N	N	N	N
	93	Adonitol fermentation	N	N	N	0
	94	Maltose oxidation	N	N	N	N
	95	Maltose fermentation	N	N	N	0
	96	D-Glucose oxidation	P	P	P	P
	97	D-Glucose fermentation	N	N	N	0
OX	98	Motility	P	P	P	Pa
	99	Nutrient agar 42°C (growth)	N	N	N	N
	100	Drigalski agar 30°C (growth)	P	P	P	P
	101	Blood agar 37°C (growth)	N	P	N	N
	102	Blood agar 30°C (growth)	P	P	P	P
	103	Pigment production	N	N	N	N
	104	Penicillin (mm)	< 5	< 5	< 5	N
	105	Odour	N	N	N	N
	106	Hemolysis, horse blood	N	N	N	N
	107	Colony morphology	S	S	S	S
	108	Catalase activity	P	P	P	P
Temperature	109	4°C	N	N	N	N
	110	10°C	P	P	P	P
	111	20°C	P	P	P	P
	112	25°C	P	P	P	P
	113	30°C	P	P	P	P
	114	35°C	P	P	P	N
	115	42°C	N	N	N	N
Strains:
1: 16FHM2T
2: 15FMM2
3: 15FMM3
4: Pseudomonas mucidolens CCUG 1424T
P: Positive (green)
N: Negative (red)
0: Not determined (yellow)
S: smooth (blue)
aData obtained from BacDive (https://bacdive.dsmz.de/strain/13145).
